# Supplementary material for: Population divergence and gene flow in two East Asian shorebirds on the verge of speciation
Source: PubMed Central journal article supplement (PMC6561938; doi:10.1038/s41598-019-44996-5), 2019-06-12
Supplement: 41598_2019_44996_MOESM1_ESM.pdf [file 41598_2019_44996_MOESM1_ESM.pdf]

# Population divergence and gene flow in two East Asian shorebirds on the verge of speciation

**Keren R. Sadanandan, Clemens Küpper, Gabriel W. Low, Cheng-Te Yao, Yue Li, Tao Xu, Frank E. Rheindt\*, Shaoyuan Wu\***

\*corresponding authors

## Supplementary information

Table S1: Summary of the 122 samples used, including specimen IDs, sampling localities and collection dates.

| Sample ID | Country | Locality                  | Collection date (if available) |
|-----------|---------|---------------------------|--------------------------------|
| 1283      | China   | Beihai                    | 10 March 2004                  |
| 1284      | China   | Beihai                    | 10 March 2004                  |
| 2895      | China   | Changle, Minjiang estuary | 26 November 2004               |
| 2906      | China   | Changle, Minjiang estuary | 27 November 2004               |
| 2908      | China   | Changle, Minjiang estuary | 27 November 2004               |
| 2909      | China   | Changle, Minjiang estuary | 27 November 2004               |
| 2910      | China   | Changle, Minjiang estuary | 27 November 2004               |
| 2911      | China   | Changle, Minjiang estuary | 27 November 2004               |
| 2912      | China   | Changle, Minjiang estuary | 27 November 2004               |
| NB10FZ    | China   | Fujian, Fuzhou            | 27 May 2015                    |
| NB12FZ    | China   | Fujian, Fuzhou            | 27 May 2015                    |
| NB13FZ    | China   | Fujian, Fuzhou            | 28 May 2015                    |
| NB14FZ    | China   | Fujian, Fuzhou            | 28 May 2015                    |
| NB15FZ    | China   | Fujian, Fuzhou            | 28 May 2015                    |
| NB18FZ    | China   | Fujian, Fuzhou            | 29 May 2015                    |
| NB20FZ    | China   | Fujian, Fuzhou            | 29 May 2015                    |
| NB21FZ    | China   | Fujian, Fuzhou            | 30 May 2015                    |
| NB22FZ    | China   | Fujian, Fuzhou            | 30 May 2015                    |
| NB23FZ    | China   | Fujian, Fuzhou            | 30 May 2015                    |
| NB24FZ    | China   | Fujian, Fuzhou            | 30 May 2015                    |
| NB38FZ    | China   | Fujian, Fuzhou            | 16 May 2016                    |
| NB39FZ    | China   | Fujian, Fuzhou            | 16 May 2016                    |
| NB40FZ    | China   | Fujian, Fuzhou            | 17 May 2016                    |
| NB41FZ    | China   | Fujian, Fuzhou            | 17 May 2016                    |
| NB42FZ    | China   | Fujian, Fuzhou            | 17 May 2016                    |
| NB43FZ    | China   | Fujian, Fuzhou            | 17 May 2016                    |
| NB45FZ    | China   | Fujian, Fuzhou            | 17 May 2016                    |
| NB46FZ    | China   | Fujian, Fuzhou            | 17 May 2016                    |
| NB47FZ    | China   | Fujian, Fuzhou            | 18 May 2016                    |
| NB48FZ    | China   | Fujian, Fuzhou            | 18 May 2016                    |
| NB49FZ    | China   | Fujian, Fuzhou            | 18 May 2016                    |
| NB9FZ     | China   | Fujian, Fuzhou            | 27 May 2015                    |
| NB11FZ    | China   | Fujian, Fuzhou            | 27 May 2015                    |
| NB16FZ    | China   | Fujian, Fuzhou            | 28 May 2015                    |
| NB17FZ    | China   | Fujian, Fuzhou            | 28 May 2015                    |
| NB19FZ    | China   | Fujian, Fuzhou            | 29 May 2015                    |
| NB44FZ    | China   | Fujian, Fuzhou            | 17 May 2016                    |
| NB8FZ     | China   | Fujian, Fuzhou            | 27 May 2015                    |
| 12279     | China   | Fujian, Minjiang river    | November 2009                  |
| 12280     | China   | Fujian, Minjiang river    | November 2009                  |
| 12322     | China   | Fujian, Minjiang river    | November 2009                  |
| NB25XM    | China   | Fujian, Xiamen            | 2 June 2015                    |
| NB27XM    | China   | Fujian, Xiamen            | 3 June 2015                    |
| NB28XM    | China   | Fujian, Xiamen            | 4 June 2015                    |
| NB29XM    | China   | Fujian, Xiamen            | 4 June 2015                    |
| NB30XM    | China   | Fujian, Xiamen            | 4 June 2015                    |
| NB31XM    | China   | Fujian, Xiamen            | 4 June 2015                    |
| NB50XM    | China   | Fujian, Xiamen            | 19 May 2016                    |
| NB51XM    | China   | Fujian, Xiamen            | 19 May 2016                    |
| NB52XM    | China   | Fujian, Xiamen            | 20 May 2016                    |
| NB53XM    | China   | Fujian, Xiamen            | 20 May 2016                    |

|        |        |                                  |                   |
|--------|--------|----------------------------------|-------------------|
| NB54XM | China  | Fujian, Xiamen                   | 20 May 2016       |
| NB26XM | China  | Fujian, Xiamen                   | 3 June 2015       |
| 779    | China  | Xinjiang, Luntai                 | 11 September 2002 |
| 9736   | China  | Putian, Xinghua bay              | 20 January 2008   |
| 9737   | China  | Putian, Xinghua bay              | 20 January 2008   |
| 9738   | China  | Putian, Xinghua bay              | 20 January 2008   |
| 9739   | China  | Putian, Xinghua bay              | 20 January 2008   |
| 9740   | China  | Putian, Xinghua bay              | 20 January 2008   |
| 9741   | China  | Putian, Xinghua bay              | 20 January 2008   |
| 9743   | China  | Putian, Xinghua bay              | 20 January 2008   |
| 9744   | China  | Putian, Xinghua bay              | 20 January 2008   |
| 9745   | China  | Putian, Xinghua bay              | 20 January 2008   |
| 4421   | China  | Qinghai, Gangcha                 | 13 August 2005    |
| 4432   | China  | Qinghai, Gangcha                 | 13 August 2005    |
| 5551   | China  | Qinghai, Hada beach              | 20 April 2007     |
| 5554   | China  | Qinghai, Hada beach              | 21 April 2007     |
| 5555   | China  | Qinghai, Hada beach              | 21 April 2007     |
| 528    | China  | Qinhuangdao                      | 24 August 2001    |
| 529    | China  | Qinhuangdao                      | 24 August 2001    |
| 2678   | China  | Shanghai                         | -                 |
| 3241   | China  | Yuanjiang, Dragon-Tiger forestry | 19 December 2004  |
| 1435   | China  | Zhanjiang, Leizhou river         | 17 March 2004     |
| 1436   | China  | Zhanjiang, Leizhou river         | 17 March 2004     |
| 1437   | China  | Zhanjiang, Leizhou river         | 17 March 2004     |
| NB1HZ  | China  | Zhejiang, Wenling                | 17 May 2015       |
| NB2WL  | China  | Zhejiang, Wenling                | 19 May 2015       |
| NB32WL | China  | Zhejiang, Wenling                | 11 May 2016       |
| NB33WL | China  | Zhejiang, Wenling                | 12 May 2016       |
| NB34WL | China  | Zhejiang, Wenling                | 12 May 2016       |
| NB4WL  | China  | Zhejiang, Wenling                | 21 May 2015       |
| NB35WZ | China  | Zhejiang, Wenzhou                | 13 May 2016       |
| NB36WZ | China  | Zhejiang, Wenzhou                | 13 May 2016       |
| NB37WZ | China  | Zhejiang, Wenzhou                | 14 May 2016       |
| NB6WZ  | China  | Zhejiang, Wenzhou                | 23 May 2015       |
| NB7WZ  | China  | Zhejiang, Wenzhou                | 24 May 2015       |
| NB5WZ  | China  | Zhejiang, Wenzhou                | 23 May 2015       |
| 586    | Japan  | Chiba, Kisarazu                  | 29 August 2004    |
| 238    | Japan  | Ibaraki, Kamisu                  | 17 June 2007      |
| 239    | Japan  | Ibaraki, Kamisu                  | 17 June 2007      |
| 446    | Japan  | Ibaraki, Kamisu                  | 21 July 2008      |
| 450    | Japan  | Ibaraki, Kamisu                  | 21 July 2008      |
| 842    | Japan  | Ibaraki, Kamisu                  | 27 June 2009      |
| 843    | Japan  | Ibaraki, Kamisu                  | 27 June 2009      |
| 888    | Japan  | Japan                            | 30 June 2006      |
| 886    | Japan  | Okinawa                          | 14 May 2007       |
| 590    | Japan  | Okinawa, Itoman                  | 30 June 2006      |
| 601    | Spain  | Fuente de Piedra                 | -                 |
| 602    | Spain  | Fuente de Piedra                 | -                 |
| 603    | Spain  | Fuente de Piedra                 | -                 |
| 604    | Spain  | Fuente de Piedra                 | -                 |
| 605    | Spain  | Fuente de Piedra                 | -                 |
| 606    | Spain  | Fuente de Piedra                 | -                 |
| 607    | Spain  | Fuente de Piedra                 | -                 |
| 1306   | Taiwan | Changhua County                  | 16 January 1998   |
| 1364   | Taiwan | Changhua County                  | 16 January 1998   |
| 1895   | Taiwan | Changhua County                  | 2003              |
| 2933   | Taiwan | Changhua County                  | 2004              |

|      |        |                 |                  |
|------|--------|-----------------|------------------|
| 7577 | Taiwan | Changhua County | 22 March 2008    |
| 2802 | Taiwan | Hsinchu city    | 2003             |
| 2803 | Taiwan | Hsinchu city    | 2003             |
| 2804 | Taiwan | Hsinchu city    | 2003             |
| 2853 | Taiwan | Hsinchu city    | 2003             |
| 2854 | Taiwan | Hsinchu city    | 2003             |
| 2855 | Taiwan | Hsinchu city    | 2003             |
| 2856 | Taiwan | Hsinchu city    | 2003             |
| 2857 | Taiwan | Hsinchu city    | 2003             |
| 6689 | Taiwan | Nantou County   | 28 May 2008      |
| 1843 | Taiwan | Taichung city   | 2003             |
| 5620 | Taiwan | Taichung city   | 17 October 2007  |
| 6065 | Taiwan | Taichung city   | 24 October 2007  |
| 3476 | Taiwan | Taoyuan city    | 20 December 2003 |

Table S2: Summary of the field data collected during the 2015 and 2016 field seasons, including GPS coordinates and morphological measurements (all distance units in are in millimetres).

| Sample ID | Location_GPS                       | Sex | Wing  | Bill  | Bill depth | Bill+head | Tarsus | Tail | Full length | Weight (g) |
|-----------|------------------------------------|-----|-------|-------|------------|-----------|--------|------|-------------|------------|
| NB1       | 28°09'36.75" N;<br>121°19'05.54" E | F   | 116   | 15.80 | 3.50       | 42.64     | 28.30  | 49.0 | -           | 41.54      |
| NB2       | 28°09'36.75" N;<br>121°19'05.54" E | F   | 111   | 15.20 | 3.50       | 42.50     | 27.30  | 46.0 | -           | 46.23      |
| NB3       | 28°09'36.75" N;<br>121°19'05.54" E | F   | 117   | 15.30 | 3.60       | 41.90     | 26.30  | 50.0 | -           | 44.54      |
| NB4       | 28°09'36" N;<br>121°18'52"E        | M   | 106   | 15.40 | 3.30       | 43.90     | 27.10  | 48.0 | 166         | 42         |
| NB5       | 27°55'11"N;<br>120°56'1"E          | F   | 110.5 | 18.20 | 3.30       | 44.00     | 28.80  | 54.0 | 175         | 50         |
| NB6       | 27°55'11"N;<br>120°56'1"E          | F   | 106   | 17.80 | 3.10       | 42.50     | 27.80  | 45.4 | 162         | 40         |
| NB7       | 27°55'11"N;<br>120°56'1"E          | M   | 107   | 17.10 | 3.50       | 43.20     | 26.10  | 41.6 | 162         | 45         |
| NB8       | 26°1'24.1"N;<br>119°41'0.4"E       | F   | 114   | 19.30 | 3.85       | 45.90     | 28.40  | 48.0 | 165         | 50         |
| NB9       | 26°1'24.1"N;<br>119°41'0.4"E       | F   | 116   | 18.85 | 4.32       | 45.80     | 28.30  | 48.0 | 165         | 53         |
| NB10      | 26°1'24.1"N;<br>119°41'0.4"E       | F   | 118.5 | 19.10 | 4.19       | 46.40     | 28.20  | 53.0 | 166         | 52         |
| NB11      | 26°1'24.1"N;<br>119°41'0.4"E       | M   | 115   | 20.02 | 4.14       | 46.80     | 28.60  | 47.0 | 163         | 48         |
| NB12      | 26°1'24.1"N;<br>119°41'0.4"E       | F   | 121   | 18.00 | 4.20       | 46.82     | 29.20  | 52.0 | 178         | 57         |
| NB13      | 26°1'24.1"N;<br>119°41'0.4"E       | F   | 116   | 18.50 | 4.20       | 47.10     | 29.11  | 50.0 | 172         | 54         |
| NB14      | 26°1'24.1"N;<br>119°41'0.4"E       | M   | 111   | 17.35 | 3.50       | 45.40     | 30.42  | 50.1 | 171         | 50         |

|      |                                      |           |     |       |      |       |       |      |     |                 |
|------|--------------------------------------|-----------|-----|-------|------|-------|-------|------|-----|-----------------|
| NB15 | 26°1'24.1"N;<br>119°41'0.4"E         | F         | 115 | 17.85 | 3.78 | 44.18 | 28.10 | 54.0 | 166 | 51              |
| NB16 | 26°1'24.1"N;<br>119°41'0.4"E         | F         | 114 | 19.62 | 4.00 | 46.28 | 27.92 | 48.0 | 167 | 58              |
| NB17 | 26°1'24.1"N;<br>119°41'0.4"E         | F         | 111 | 19.65 | 3.60 | 45.43 | 29.50 | 46.0 | 165 | 62              |
| NB18 | 26°1'24.1"N;<br>119°41'0.4"E         | F         | 112 | 18.79 | 4.00 | 47.20 | 25.72 | 44.0 | 170 | -               |
| NB19 | 26°1'24.1"N;<br>119°41'0.4"E         | F         | 118 | 19.45 | 3.51 | 46.35 | 29.00 | 53.8 | 175 | 50              |
| NB20 | 26°1'24.1"N;<br>119°41'0.4"E         | F         | 109 | 17.00 | 3.65 | 47.20 | 30.45 | 49.9 | 177 | 50              |
| NB21 | 26°1'24.1"N;<br>119°41'0.4"E         | F         | 109 | 17.00 | 3.80 | 42.50 | 26.20 | 51.2 | 162 | 47              |
| NB22 | 26°1'24.1"N;<br>119°41'0.4"E         | M         | 112 | 17.40 | 3.39 | 45.65 | 28.28 | 53.0 | 172 | 51.5            |
| NB23 | 26°1'24.1"N;<br>119°41'0.4"E         | F         | 108 | 17.70 | 3.75 | 45.70 | 28.24 | 43.0 | 170 | 64(with<br>egg) |
| NB24 | 26°1'24.1"N;<br>119°41'0.4"E         | M         | 111 | 19.81 | 3.10 | 45.30 | 28.00 | 47.0 | 157 | 45              |
| NB25 | 24°33'28.0"N;<br>118°17'43.9"E       | F         | 108 | 18.80 | 3.58 | 45.25 | 27.90 | 49.0 | 171 | 51              |
| NB26 | 24°33'28.0"N;<br>118°17'43.9"E       | chi<br>ck | 73  | 14.65 | 3.01 | 39.85 | 27.90 | 23.0 | 125 | 26              |
| NB27 | 24°33'28.0"N;<br>118°17'43.9"E       | F         | 111 | 17.50 | 3.70 | 44.72 | 28.90 | 45.0 | 168 | 47              |
| NB28 | 24°33'28.0"N;<br>118°17'43.9"E       | F         | 113 | 18.10 | 4.11 | 45.25 | 26.95 | 48.0 | 160 | 50              |
| NB29 | 24°33'28.0"N;<br>118°17'43.9"E       | M         | 117 | 19.22 | 4.20 | 46.81 | 28.65 | 49.0 | 160 | 53              |
| NB30 | 24°33'28.0"N;<br>118°17'43.9"E       | F         | 110 | 16.40 | 3.51 | 44.85 | 27.18 | 50.0 | 174 | 46              |
| NB31 | 24°33'28.0"N;<br>118°17'43.9"E       | M         | 110 | 17.90 | 3.52 | 44.32 | 29.63 | 51.0 | 175 | 53              |
| NB32 | 28°9'16.02"N;<br>121°19'10.235'<br>E | F         | 115 | 17.5  | 4.5  | 43.5  | 32    | -    | 171 | -               |
| NB33 | 28°9'16.02"N;<br>121°19'6.383"<br>E  | F         | 112 | 16.5  | 5.1  | 43.1  | 29.5  | 45   | 169 | -               |
| NB34 | 28°9'16.02"N;<br>121°19'6.383"<br>E  | F         | 120 | 17.3  | 5    | 43.3  | 29.7  | 51   | 171 | -               |
| NB35 | 27°56'6"N;<br>120°58'1.523"<br>E     | F         | 112 | 17.1  | 4.7  | 43.9  | 27.3  | 42   | 166 | -               |
| NB36 | 27°56'6"N;<br>120°58'1.523"<br>E     | M         | 107 | 16.2  | 4.6  | 42.7  | 29.4  | 47   | 165 | -               |
| NB37 | 27°56'6"N;<br>120°58'1.523"<br>E     | M         | 106 | 16.5  | 4.9  | 43.3  | 30.5  | 41   | 168 | -               |
| NB38 | 26°1'24.1"N;<br>119°41'0.4"E         | M         | 119 | 18.1  | 5.5  | 47.2  | 30.8  | 52   | 181 | -               |
| NB39 | 26°1'24.1"N;<br>119°41'0.4"E         | M         | 115 | 17.9  | 4.8  | 46.6  | 28.9  | 47   | 175 | -               |

|      |                                            |   |     |      |     |      |      |    |     |   |
|------|--------------------------------------------|---|-----|------|-----|------|------|----|-----|---|
| NB40 | 26°1'24.1"N;<br>119°41'0.4"E               | M | 114 | 16.6 | 5.1 | 45.7 | 29.5 | 48 | 178 | - |
| NB41 | 26°1'24.1"N;<br>119°41'0.4"E               | M | 115 | 17.6 | 4.9 | 46.4 | 29.9 | 52 | 183 | - |
| NB42 | 26°1'24.1"N;<br>119°41'0.4"E               | M | 115 | 17.8 | 5.2 | 46.6 | 31.5 | 50 | 181 | - |
| NB43 | 26°1'24.1"N;<br>119°41'0.4"E               | F | 115 | 17.2 | 5.2 | 43.1 | 28.7 | 48 | 174 | - |
| NB44 | 26°1'24.1"N;<br>119°41'0.4"E               | F | 112 | 17.1 | 5   | 44.2 | 29.5 | 46 | 172 | - |
| NB45 | 26°1'24.1"N;<br>119°41'0.4"E               | F | 119 | 18.7 | 5.5 | 46.7 | 29.3 | 49 | 180 | - |
| NB46 | 26°1'24.1"N;<br>119°41'0.4"E               | F | 114 | 18   | 4.8 | 45.6 | 30.1 | 48 | 176 | - |
| NB47 | 26°1'24.1"N;<br>119°41'0.4"E               | F | 111 | 18   | 5.3 | 46.1 | 29.1 | 48 | 179 | - |
| NB48 | 26°1'24.1"N;<br>119°41'0.4"E               | F | 116 | 17.9 | 4.9 | 45   | 27.9 | 52 | 177 | - |
| NB49 | 26°1'24.1"N;<br>119°41'0.4"E               | M | 116 | 18.6 | 5   | 47   | 28.9 | 50 | 182 | - |
| NB50 | 24°32'39.516"<br>N;<br>118°18'51.804'<br>E | F | 111 | 17.9 | 5.4 | 45.1 | 26.8 | 50 | 175 | - |
| NB51 | 24°32'39.516"<br>N;<br>118°18'51.804'<br>E | F | 112 | 17.1 | 5.6 | 46.9 | 28.9 | 48 | 172 | - |
| NB52 | 24°32'39.516"<br>N;<br>118°18'51.804'<br>E | F | 114 | 17.9 | 4.9 | 44.8 | 29.1 | 49 | 172 | - |
| NB53 | 24°32'39.516"<br>N;<br>118°18'51.804'<br>E | M | 115 | -    | 5.2 | 44.5 | 23   | 50 | 175 | - |
| NB54 | 24°32'39.516"<br>N;<br>118°18'51.804'<br>E | F | 119 | 17.7 | 5.3 | 43.9 | 28.5 | 52 | 179 | - |

Table S3: Results of two-way ANOVA run on morphological measurements of genomically-prescribed Kentish and White-faced Plover groups. Significance codes are as follows: '\*\*\*' 0.001 '\*\*' 0.01 '\*' 0.05

|                 | Wing   | Bill      | Bill_head | Bill_depth | Tarsus   | Tail    | Weight | Full_length |
|-----------------|--------|-----------|-----------|------------|----------|---------|--------|-------------|
| Species         | 0.8676 | 0.0008*** | 0.0175*   | 0.6610     | 0.8725   | 0.1594  | 0.8400 | 0.2692      |
| Sex             | 0.4993 | 0.4013    | 0.2019    | 0.9180     | 0.4757   | 0.7690  | 0.7810 | 0.6278      |
| Species and sex | 0.0646 | 0.5281    | 0.3433    | 0.4290     | 0.0029** | 0.0366* | 0.9140 | 0.0199*     |

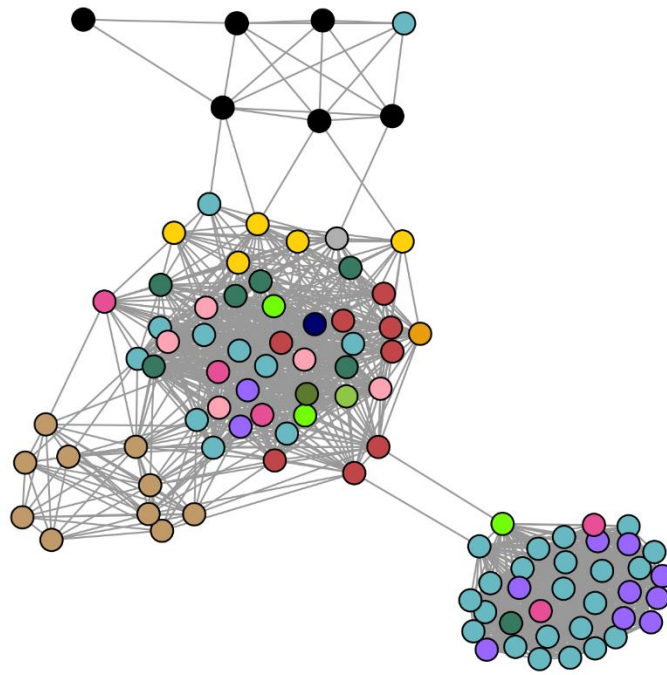

Figure S1: Kamada-Kawai force-directed depictions of mutual  $k$ -nearest neighbor network graphs for  $k = 35$  show a network with two distinct clusters formed. Colours of circles reflect localities as per PCA diagram (Fig. 3), except Spain (depicted by black circles) and Xinjiang (depicted by gray circles).

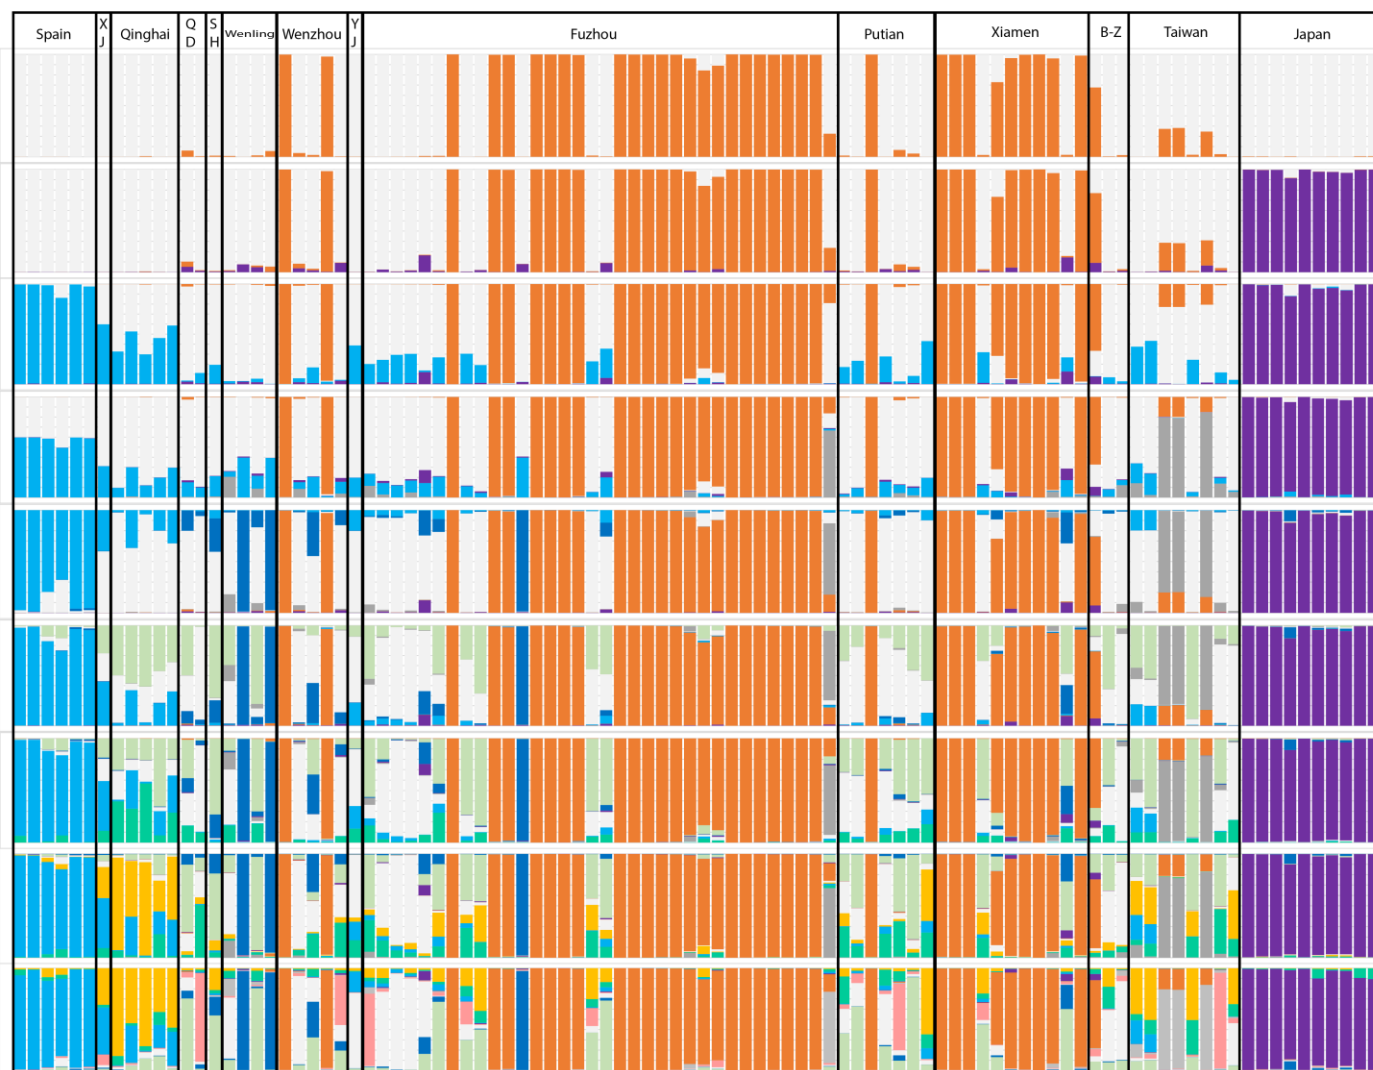

Figure S2: Averaged results of 5 iterations in `STRUCTURE` for  $K$  values from 2 (top) to 10 (bottom). Samples are grouped by sampling locality.
